# Supplementary material
Source: PubMed Central journal article supplement (PMC8203751)
Supplement: NIHMS1646951-supplement-Supplementary_info_2.pdf [file NIHMS1646951-supplement-Supplementary_info_2.pdf]

| qPCR Primers <sup>1,2</sup> |                       |                        |
|-----------------------------|-----------------------|------------------------|
| Gene                        | Forward Primer        | Reverse Primer         |
| Nr4a2                       | GACCGGCTCTATGGAGATCA  | CTGGGTGGACCTGTATGCT    |
| Cartpt                      | ACGAGAAGGAGCTGATCGAA  | TCTCTGAGGGGAACGCAAAC   |
| Dat                         | TGCTCTCAGTCATCGGCTTC  | TCTGTTGAACTGCCCGAGAG   |
| Th                          | GTGAGGACTGTCCAGTACATC | TCTGGGGGCTTCAGATGAAGAA |

| ChIP primers <sup>1,2</sup> |                       |                      |
|-----------------------------|-----------------------|----------------------|
| Gene                        | Forward Primer        | Reverse Primer       |
| Nr4a2                       | GCGAGTGTCTTTTCCGTTT   | TGAAGTCCGTGGTGATGCTA |
| Cartpt                      | ACACAAGAGCCGTCAATTCCA | TCGAGTTCCCAACACCGC   |
| Dat                         | TGGCTTCGTTGTCTTCTTCCT | CAGCTGGAACTCATCGACAA |
| Th                          | GTGGGCATAGTGCAAGCTG   | GGTAGGAGGTGGGGGACC   |
