# Supplementary material
Source: PubMed Central journal article supplement (PMC8203751)

# Supplementary Figure 1

A

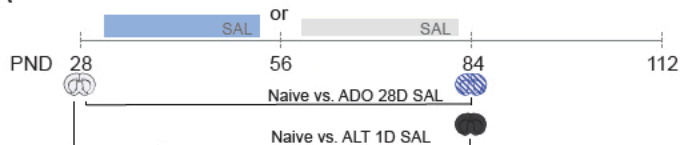

B

qPCR - Nr4a2

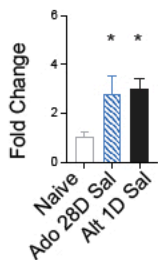

C

qPCR - Cartpt

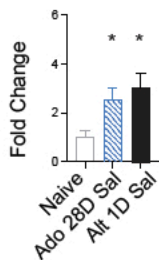

D

qPCR - Dat

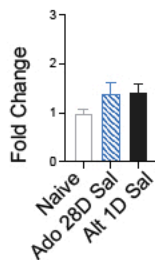

E

qPCR - Th

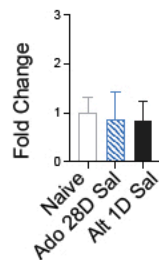

F

qChIP: H3K27me3 - Nr4a2

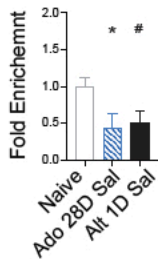

G

qChIP: H3K27me3 - Cartpt

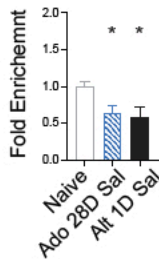

H

qChIP: H3K27me3 - Dat

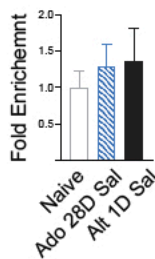

I

qChIP: H3K27me3 - Th

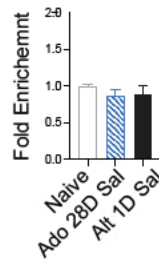

Supplement: NIHMS1646951-supplement-Supplementary_info_3.pdf [file NIHMS1646951-supplement-Supplementary_info_3.pdf]
