# Supplementary material
Source: PubMed Central journal article supplement (PMC8203751)

## Supplementary Figure 2

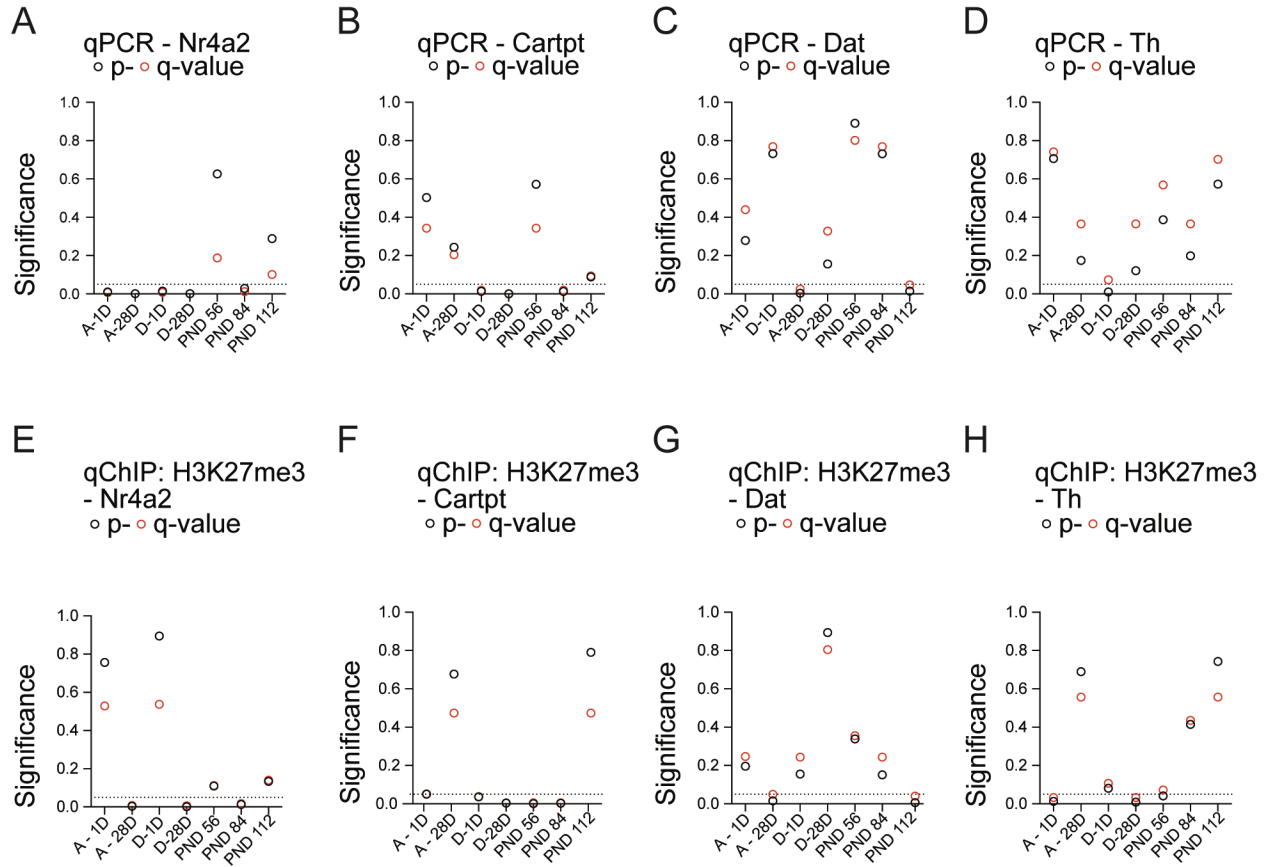

Supplement: NIHMS1646951-supplement-Supplementary_info_1.pdf [file NIHMS1646951-supplement-Supplementary_info_1.pdf]
